# Supplementary material for: Temporal Trends in Characteristics and Outcomes Associated With In‐Hospital Cardiac Arrest: A 20‐Year Analysis (1999–2018)
Source: PubMed Central journal article supplement — J Am Heart Assoc. 2021 Dec 2;10(23):e021572. doi: 10.1161/JAHA.121.021572 (PMC9075365; doi:10.1161/jaha.121.021572), 2021-12-02
Supplement: JAH3-10-e021572-s001.pdf [file JAH3-10-e021572-s001.pdf]

# **SUPPLEMENTAL MATERIAL**

**Table S1. ICD-9 and ICD-10 Codes used for analysis.**

|                                                  | ICD 9                                                                                                                                                                                                                                                      | ICD 10                                                                                                                                                                                                                       |
|--------------------------------------------------|------------------------------------------------------------------------------------------------------------------------------------------------------------------------------------------------------------------------------------------------------------|------------------------------------------------------------------------------------------------------------------------------------------------------------------------------------------------------------------------------|
| In-Hospital Cardiac Arrest                       | 9960, 9963                                                                                                                                                                                                                                                 | 5A12012                                                                                                                                                                                                                      |
| Out Hospital Cardiac Arrest                      | 4275                                                                                                                                                                                                                                                       | I46                                                                                                                                                                                                                          |
| Ventricular Tachycardia/Ventricular Fibrillation | 4274.xx                                                                                                                                                                                                                                                    | I472, I490                                                                                                                                                                                                                   |
| Sepsis                                           | 0031 0202 0223 0362 0380 0381<br>03810 03811 03812 03819 0382<br>0383 03840 03841 03842 03843<br>03844 03849 0388 0389 0545 449<br>77181 7907 99591 99592 481 482<br>483 484 485 486 5950                                                                  | A021 A207 A227 A267 A327 A392<br>A393 A394 A400 A401 A403 A408<br>A409 A4101 A4102 A411 A412<br>A413 A414 A4150 A4151 A4152<br>A4153 A4159 A4181 A4189 A419<br>A427 A5486 B007 B377I76 J13 J14<br>J15 J16 J17 J18 N390 R7881 |
| Acute Myocardial Infarction                      | 4100 41000 41001 41002 4101<br>41010 41011 41012 4102 41020<br>41021 41022 4103 41030 41031<br>41032 4104 41040 41041 41042<br>4105 41050 41051 41052 4106<br>41060 41061 41062 4107 41070<br>41071 41072 4108 41080 41081<br>41082 4109 41090 41091 41092 | I21.x                                                                                                                                                                                                                        |
| Respiratory failure                              | 5173 5185 51851 51852 51853<br>51881 51882 51883 51884 7991<br>V461 V4611 V4612 V4613 V4614<br>V462                                                                                                                                                        | J80 J95821 J95822 J9600 J9601<br>J9602 J9610 J9611 J9612 J9620<br>J9621J9622 J9690 J9691 J9692<br>R092                                                                                                                       |
| Heart failure                                    | 39891 4280 4281 42820 42821<br>42822 42823 42830 42831 42832<br>42833 42840 42841 42842 42843<br>4289                                                                                                                                                      | I0981 I110 I130 I132 I501 I5020<br>I5021 I5022 I5023 I5030 I5031 I5032<br>I5033 I5040 I5041 I5042 I5043<br>I50810 I50811 I50812 I50813 I50814<br>I5082 I5083 I5084 I5089 I509 I97130<br>I97131                               |
| Target temperature management                    | 9981                                                                                                                                                                                                                                                       | 6A4Z0ZZ                                                                                                                                                                                                                      |
| Coronary Angiography                             | 3722                                                                                                                                                                                                                                                       | 4A023N7 4A023N8                                                                                                                                                                                                              |
| Percutaneous coronary intervention               | 3601 3602 3605 3606 3607 3609<br>0066                                                                                                                                                                                                                      | 02703 02704 02713 02714 02723<br>02724 02733 02734                                                                                                                                                                           |
| Extracorporeal membrane oxygenation              | 3965                                                                                                                                                                                                                                                       | 5A1522F 5A1522G 5A1522H                                                                                                                                                                                                      |

**Table S2. Charlson Comorbidity Index code.**

| Comorbidities                         | ICD-9-CM                                           | ICD-10                                                                                                                                                                        |
|---------------------------------------|----------------------------------------------------|-------------------------------------------------------------------------------------------------------------------------------------------------------------------------------|
| Myocardial infarction                 | 410.x, 412.x                                       | I21.x, I22.x, I25.2                                                                                                                                                           |
| Congestive heart failure              | 428.x                                              | I09.9, I11.0, I13.0, I13.2, I25.5, I42.0, I42.5-I42.9, I43.x, I50.x, P29.0                                                                                                    |
| Peripheral vascular disease           | 443.9, 441.x, 785.4, V43.4<br>38.48                | I70.x, I71.x, I73.1, I73.8, I73.9, I77.1, I79.0, I79.2, K55.1, K55.8, K55.9, Z95.8, Z95.9                                                                                     |
| Cerebrovascular disease               | 430.x-438.x                                        | G45.x, G46.x, H34.0, I60.x-I69.x                                                                                                                                              |
| Dementia                              | 290.x                                              | F00.x-F03.x, F05.1, G30.x, G31.1                                                                                                                                              |
| Chronic pulmonary disease             | 490.x-505.x, 506.4                                 | I27.8, I27.9, J40.x-J47.x, J60.x-J67.x, J68.4, J70.1, J70.3                                                                                                                   |
| Connective tissue disorder            | 710.0, 710.1, 710.4, 714.0-714.2,<br>714.81, 725.x | M05.x, M06.x, M31.5, M32.x-M34.x, M35.1, M35.3, M36.0                                                                                                                         |
| Peptic ulcer disease                  | 531.x-534.x                                        | K25.x-K28.x                                                                                                                                                                   |
| liver disease                         | 571.2, 571.4-571.6                                 | B18.x, K70.0-K70.3, K70.9, K71.3-K71.5, K71.7, K73.x, K74.x K76.0, K76.2-K76.4, K76.8, K76.9, Z94.4                                                                           |
| Diabetes without chronic complication | 250.0-250.3, 250.7                                 | E10.0, E10.I, E10.6, E10.8, E10.9, E11.0, E11.1, E11.6, E11.8, E11.9, E12.0, E12.1, E12.6, E12.8, E12.9, E13.0, E13.1, E13.6, E13.8, E13.9, E14.0, E14.1, E14.6, E14.8, E14.9 |
| Diabetes with chronic complication    | 250.4-250.6                                        | E10.2-E10.5, E10.7, E11.2-E11.5, E11.7, E12.2-E12.5, E12.7, E13.2-E13.5, E13.7, E14.2-E14.5, E14.7                                                                            |
| Hemiplegia or paraplegia              | 344.1, 342.x                                       | G04.1, G11.4, G80.1, G80.2, G81.x, G82.x, G83.0-G83.4, G83.9                                                                                                                  |
| Renal disease                         | 582.x, 583-583.7, 585.x, 586.x,<br>588.x           | I12.0, I13.1, N03.2-N03.7, N05.2-N05.7, N18.x, N19.x, N25.0, Z49.0-Z49.2, Z94.0, Z99.2                                                                                        |
| Any malignancy                        | 140.x-172.x, 174.x-195.8,<br>200.x-208.x           | C00.x-C26.x, C30.x-C34.x, C37.x-C41.x, C43.x, C45.x-C58.x, C60.x-C76.x, C81.x-C85.x, C88.x, C90.x-C97.x                                                                       |
| Metastatic cancer                     | 196.x-199.1                                        | C77.x-C80.x                                                                                                                                                                   |
| Moderate or severe liver disease      | 456.0-456.21, 572.2-572.8                          | I85.0, I85.9, I86.4, I98.2, K70.4 K71.1, K72.1, K72.9, K76.5, K76.6, K76.7                                                                                                    |
| AIDS/HIV                              | 042.x-044.x                                        | B20.x-B22.x, B24.x                                                                                                                                                            |

AIDS = acquired immunodeficiency syndrome, HIV- human immunodeficiency virus
